# Supplementary material
Source: PubMed Central journal article supplement (PMC7095496)
Supplement: supp.pdf [file supp.pdf]

### **List of participants:**

1. ARGENTINA: P Neira, G Sheehan, (Hospital de Niños R Gutiérrez, Buenos Aires); R Álvarez, G Debaisis (Hospital de Niños P Elizalde, Buenos Aires); N Demo, G Pujales (Hospital Materno Infantil, San Luis); P Minces, E Schniltzer (Hospital Italiano, Buenos Aires); S Sáenz, M Centeno (Hospital de Niños de la Santísima Trinidad, Córdoba); M E Ratto, C Peltzer (Hospital de Niños Sor María Ludovica, La Plata, Buenos Aires); D Allende, O Maliarchuk (Hospital Provincial Castro Rendón, Neuquén); M Cabezas, I Oviedo (Hospital de Niños JJ Vilela, Rosario, Santa Fe); R Jabornisky, F Avellaneda (Hospital de Niños Juan Pablo II, Corrientes); M G Rodríguez, G Domínguez (Clínica Bazterrica, Buenos Aires). COSTA RICA: A Baltodano Agüero (Hospital Nacional de Niños "Dr. Carlos Sáenz H". Costa Rica). GREECE: D Paraschou (Children's Hospital Pesenti), M Tamiolaki (Children's Hospital Santa Sophia, Athens). PANAMA: M Johnson, A Vargas (Hospital de Niños de Panamá). SPAIN: P Azcón (Hospital Universitario Virgen de las Nieves, Granada); J. Balcells (Hospital Vall d'Hebrón, Barcelona); J.C. de Carlos (Hospital Son Dureta, Palma de Mallorca); J. Espinosa (Hospital Materno-Infantil, Badajoz); M. Frías (Hospital Universitario Reina Sofía, Córdoba); E García-Sánchez (Hospital Universitario Gregorio Marañón, Madrid); A Hernández (Hospital Puerta del Mar, Cádiz); A. Medina (Hospital Central de Asturias, Oviedo); I. Martos (Hospital Ramón y Cajal, Madrid); P Oliva (Hospital La Paz, Madrid); J Pilar (Hospital de Cruces, Baracaldo); M.Pons (Hospital Sant Joan de Deu, Esplugues); F. Rodríguez Amuedo (Hospital Materno-Infantil, Málaga); JI Sánchez Díaz (Hospital 12 de Octubre, Madrid); J M Sánchez López (Complejo Hospitalario Materno-Infantil, Las Palmas de Gran Canaria); JP Santidrián (Hospital Universitario Marqués de Valdecilla, Santander); A Serrano (Hospital Universitario del Niño Jesús, Madrid); C Valdovinos (Hospital Miguel Servet, Zaragoza). UK: J Fraser (Bristol Royal Hospital for Sick Children, Bristol) Macrae, A Petros (Great Ormond Street Hospital for Children, London).USA: G Reyes (PICU Hope children's Hospital, Illinois), Nemours.org (PICU Alfred I. duPont Hospital for Children - Wilmington, DE).
